# Supplementary material for: Synthesis of gold nanoplates by aspartate reduction of gold chlorideElectronic supplementary information (ESI) available: Fig. S1. UV/Visible-NIR extinction spectra of an aqueous dispersion of gold nanoparticles synthesized by tyrosine (a), phenylalanine (b), lysine (c), aspartate (d) and tryptophan (e). See http://www.rsc.org/suppdata/cc/b3/b315732f/
Source: Royal Society of Chemistry journal article supplement (doi:10.1039/b315732f), 2004-01-01
Supplement: b315732f.doc [file b315732f.doc]

Supplementary information

*Authors*: Yong Shao, Yongdong Jin and Shaojun Dong*

*Title*: **Synthesis of gold nanoplates by aspartate reduction of gold chloride**

*Journal***: ChemComm**

# Fig. S1 UV/Visible-NIR extinction spectra of an aqueous dispersion of gold nanoparticles synthesized by tyrosine (a), phenylalanine (b), lysine (c), aspartate (d) and tryptophan (e).

**Fig. S1**
